# Supplementary material for: A pro-inflammatory gut mucosal cytokine response is associated with mild COVID-19 disease and superior induction of serum antibodies
Source: PubMed Central journal article supplement — Mucosal Immunol. 2024 Feb;17(1):111–23. doi: 10.1016/j.mucimm.2023.11.005 (PMC10884467; doi:10.1016/j.mucimm.2023.11.005), 2024-02
Supplement: mmc1.pdf [file mmc1.pdf]

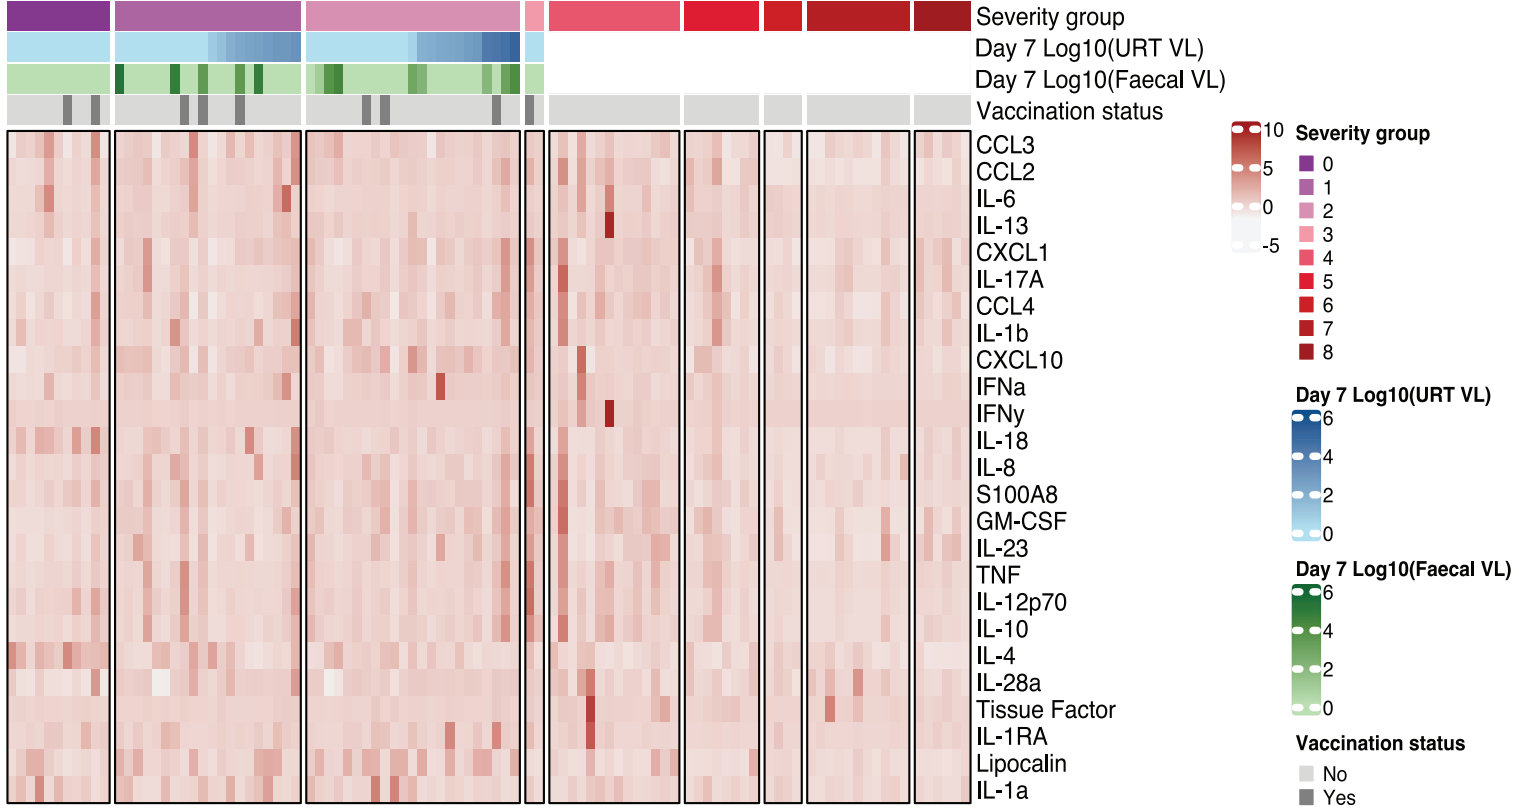

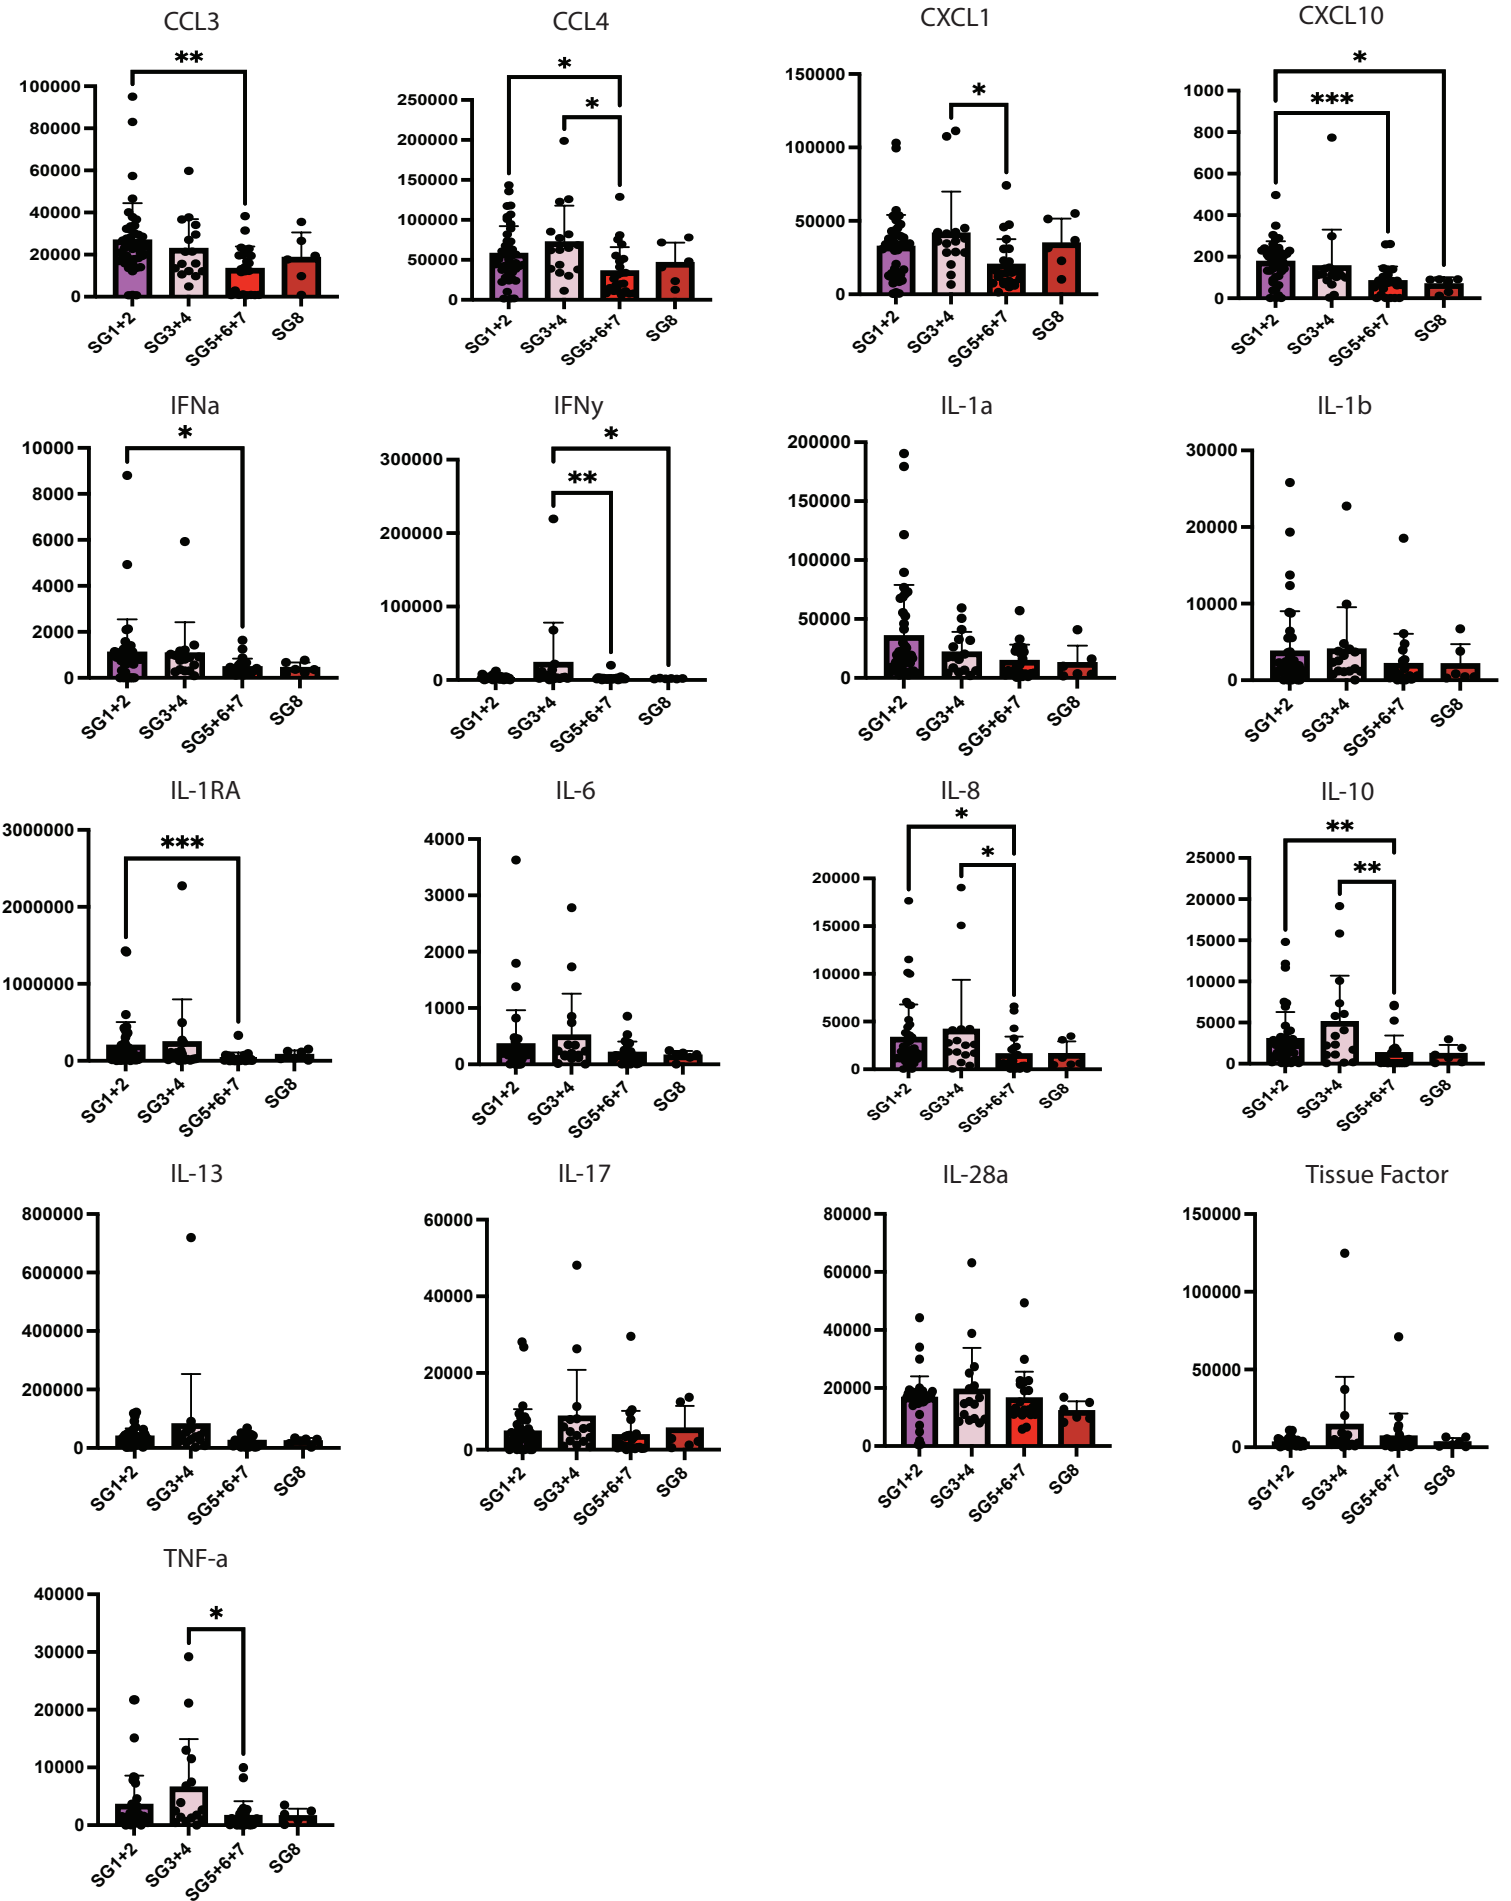

3

1

2

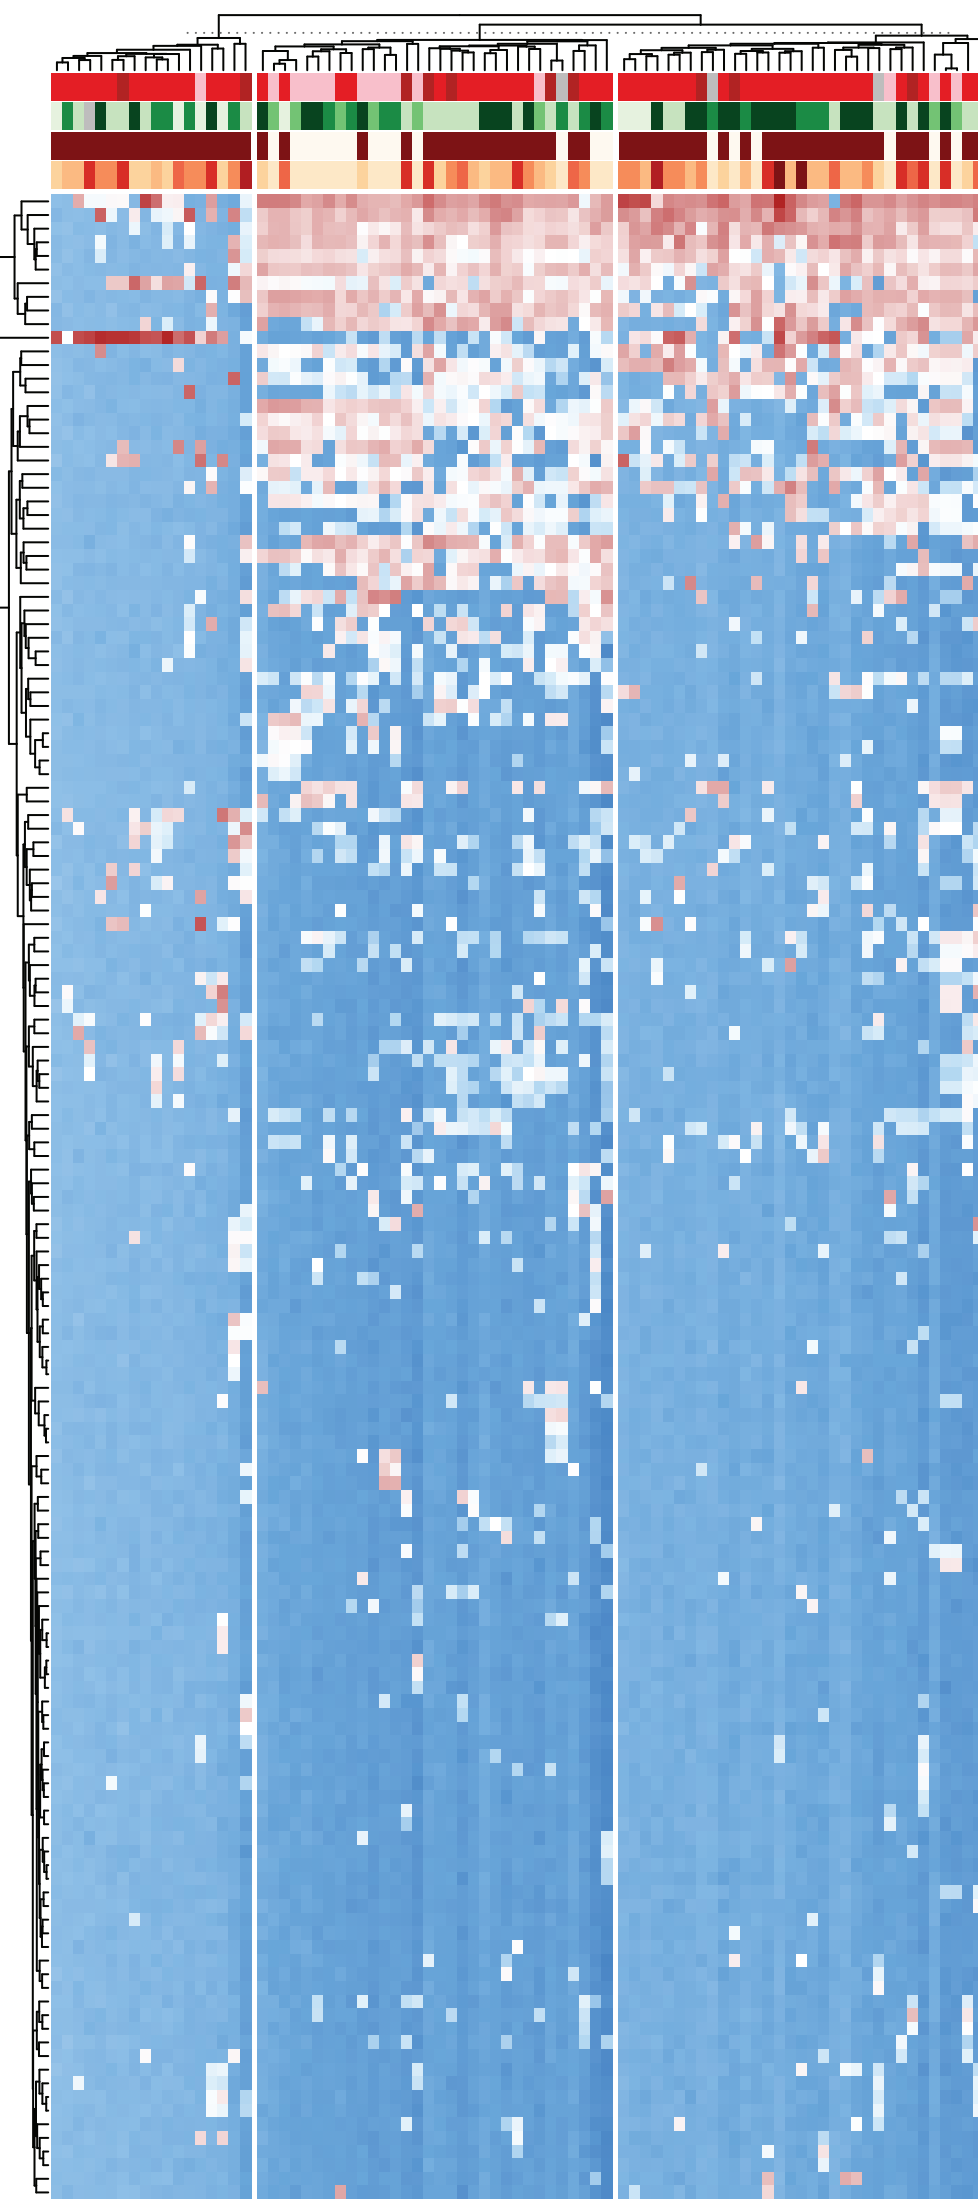

Severity Group

Age Group

Any Abx

No. Abx

- Bacteroides
- Clostridium
- Ruminococcus
- Blautia
- Ruminococcus
- Eubacterium
- Streptococcus
- Faecalibacterium
- Alistipes
- Parabacteroides
- Enterococcus
- Lachnospirillum
- Eggerthella
- Flavonifractor
- Subdoligranulum
- Roseburia
- Dorea
- Coprococcus
- Bifidobacterium
- Lactobacillus
- Gemmiger
- Eubacterium
- Odoribacter
- Butyrivibrio
- Holdemania
- Blifilium
- Collinsella
- Sutterella
- Barnesiella
- Prevotella
- Turricoccus
- Desulfotomaculum
- Senegalimassilia
- Stactobacterium
- Olsenella
- Oscillibacter
- Parasutterella
- Akkermansia
- Dialister
- Haemophilus
- Mannheimia
- Tyzzerella
- Enterorhabdus
- Phascolarctobacterium
- Pseudobutyrvibrio
- Veillonella
- Lactococcus
- Actinomyces
- Granulicatella
- Rothia
- Leuconostoc
- Corynebacterium
- Paraprevotella
- Staphylococcus
- Tannerella
- Coprobacter
- Anaerostipes
- Enterobacter
- Raoultella
- Citrobacter
- Serratia
- Klebsiella
- Escherichia/Shigella
- Trabulsilla
- Escherichia
- Cronobacter
- Salmonella
- Pseudoflavonifractor
- Anaerotruncus
- Gordonibacter
- Adlercreutzia
- Herbaspirillum
- Ruminoclostridium
- Butyrivibrio
- Catenibacterium
- Megasphaera
- Atopobium
- Gemella
- Mogibacterium
- Howardella
- Allisonella
- Faecalicoccus
- Oribacterium
- Propionibacterium
- Abiotrophia
- Leptotrichia
- Lachnoanaerobaculum
- Acidaminococcus
- Pluralibacter
- Alloprevotella
- Prevotella
- Campylobacter
- Mitsuokella
- Bulleidia
- Succinivibrio
- Pseudomonas
- Faecalitalea
- Christensenella
- Enorma
- Lachnobacterium
- Helicobacter
- Coprobacillus
- Victivallis
- Terrisporobacter
- Fusobacterium
- Negativicoccus
- Yokenella
- Acetivibrio
- Varibaculum
- Aggregatibacter
- Parvimonas
- Peptostreptococcus
- Actinobaculum
- Arthrobacter
- Balstonia
- Peptoniphilus
- Bacillus
- Burkholderia
- Anaerofilum
- Methanobrevibacter
- Robinsonella
- Romboutsia
- Gardnerella
- Parasporobacterium
- Mangrovibacter
- Anaeroglobus
- Carnobacterium
- Pediococcus
- Parvibacter
- Denitrobacterium
- Moryella
- Hafnia
- Oxalobacter
- Cloacibacillus
- Synergistes
- Acetanaerobacterium
- Scardovia
- Morganella
- Providencia
- Kluyvera
- Yersinia
- Lactonifractor
- Fingoldia
- Alloscardovia
- Acetatifactor
- Erysipelatoclostridium
- Megamonas

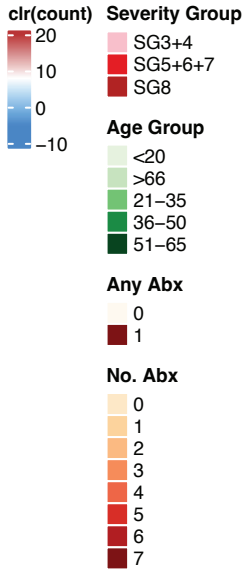

A

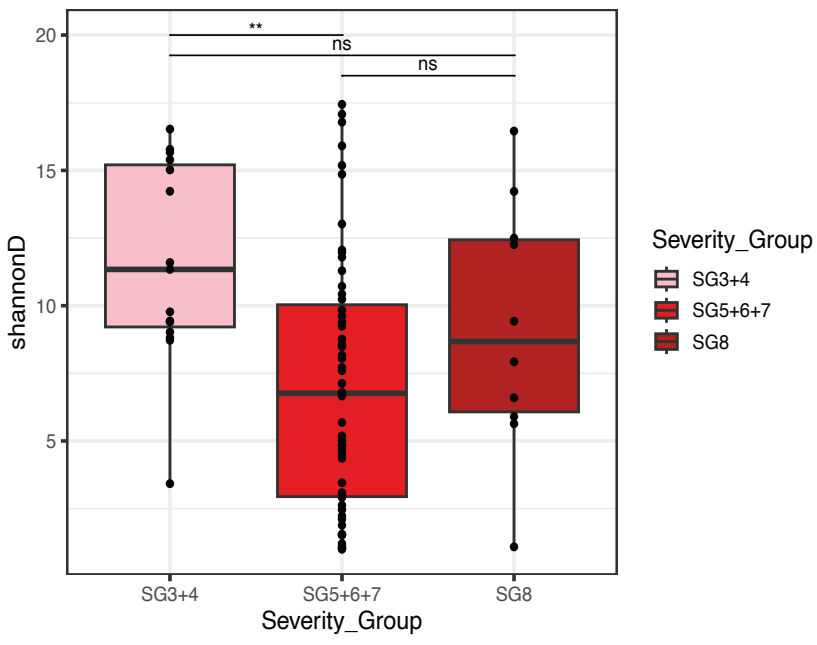

B

| Severity Group | Number of Antibiotics |    |
|----------------|-----------------------|----|
|                | 0                     | 1  |
| 3+4            | 12                    | 3  |
| 5+6+7          | 5                     | 50 |
| 8              | 1                     | 9  |

Fisher's Exact Test  $p = 2.18 \times 10^{-7}$

A

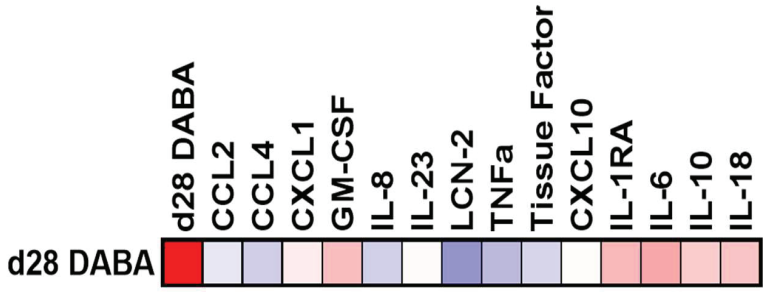

B

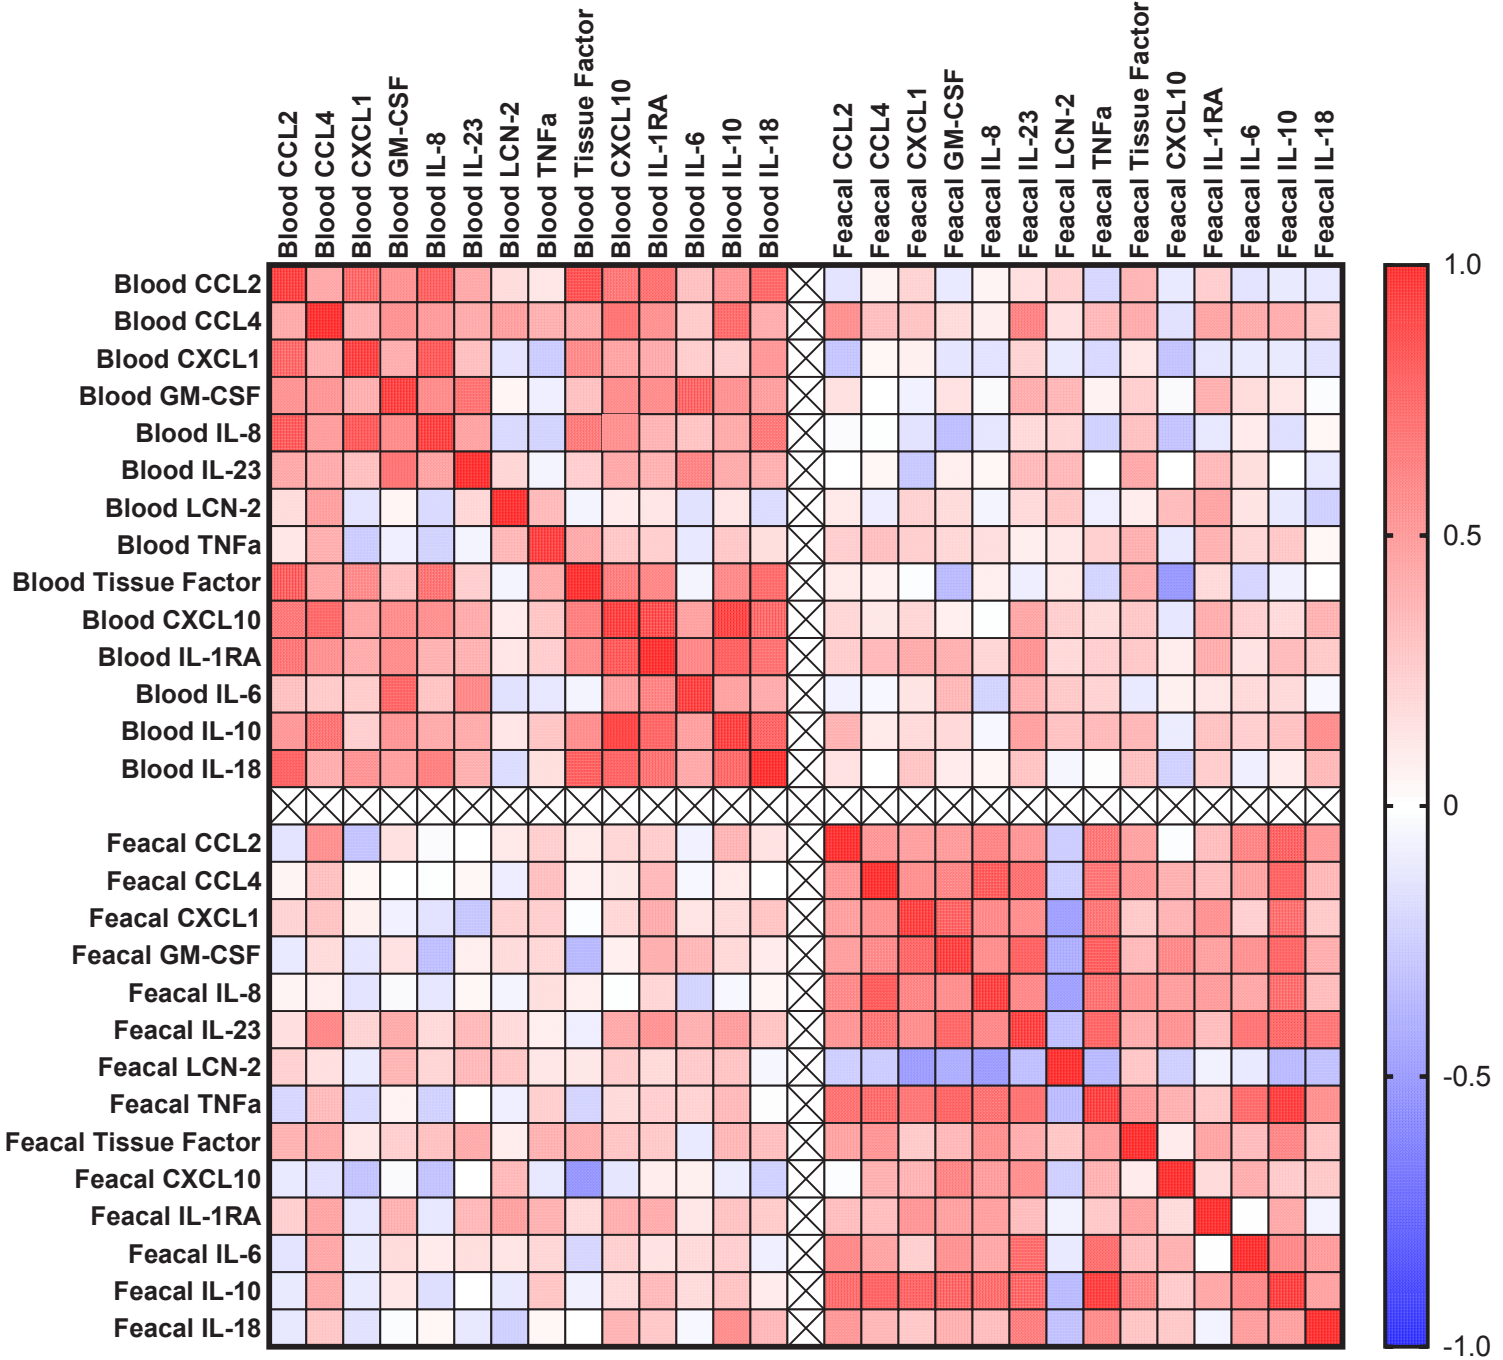

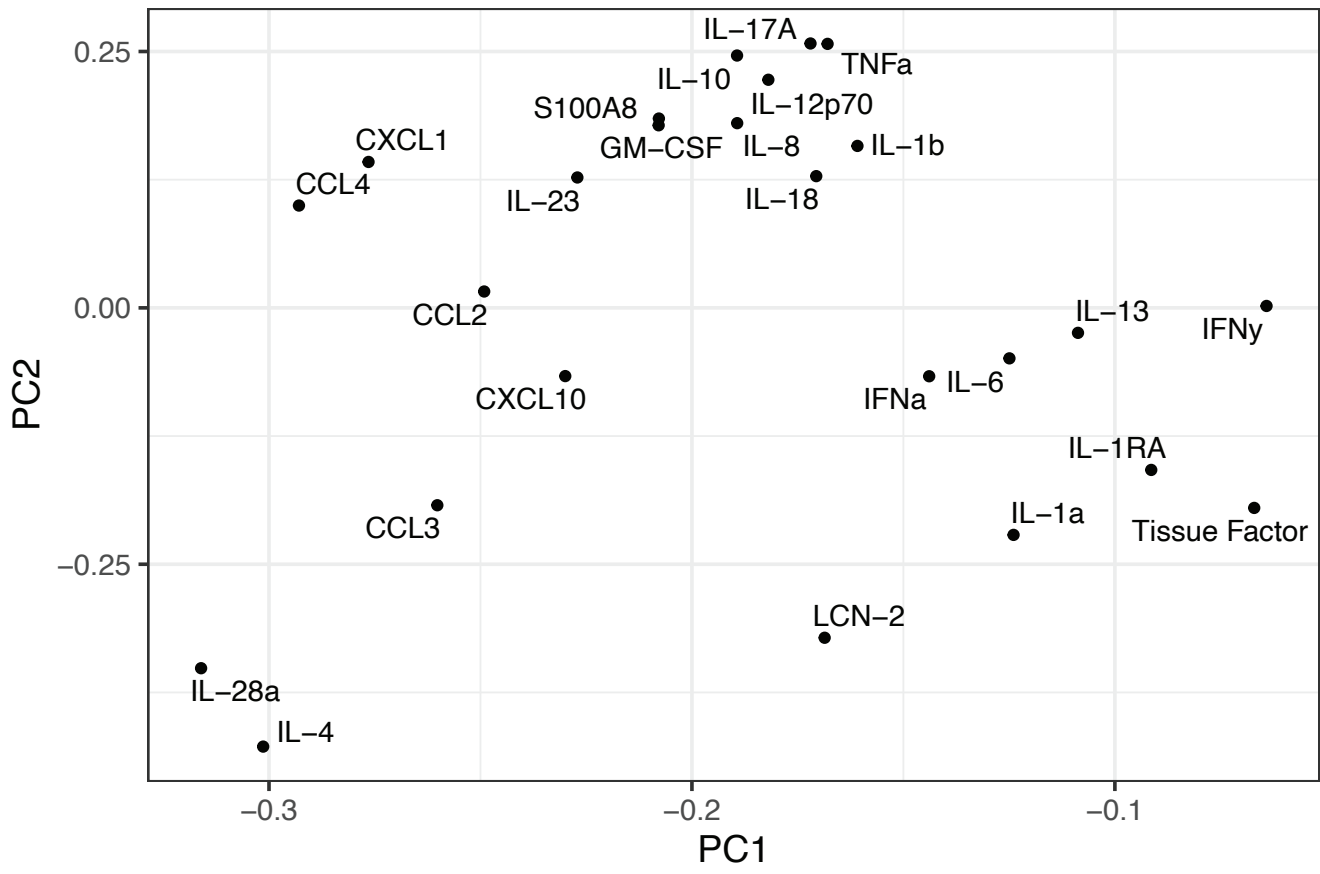

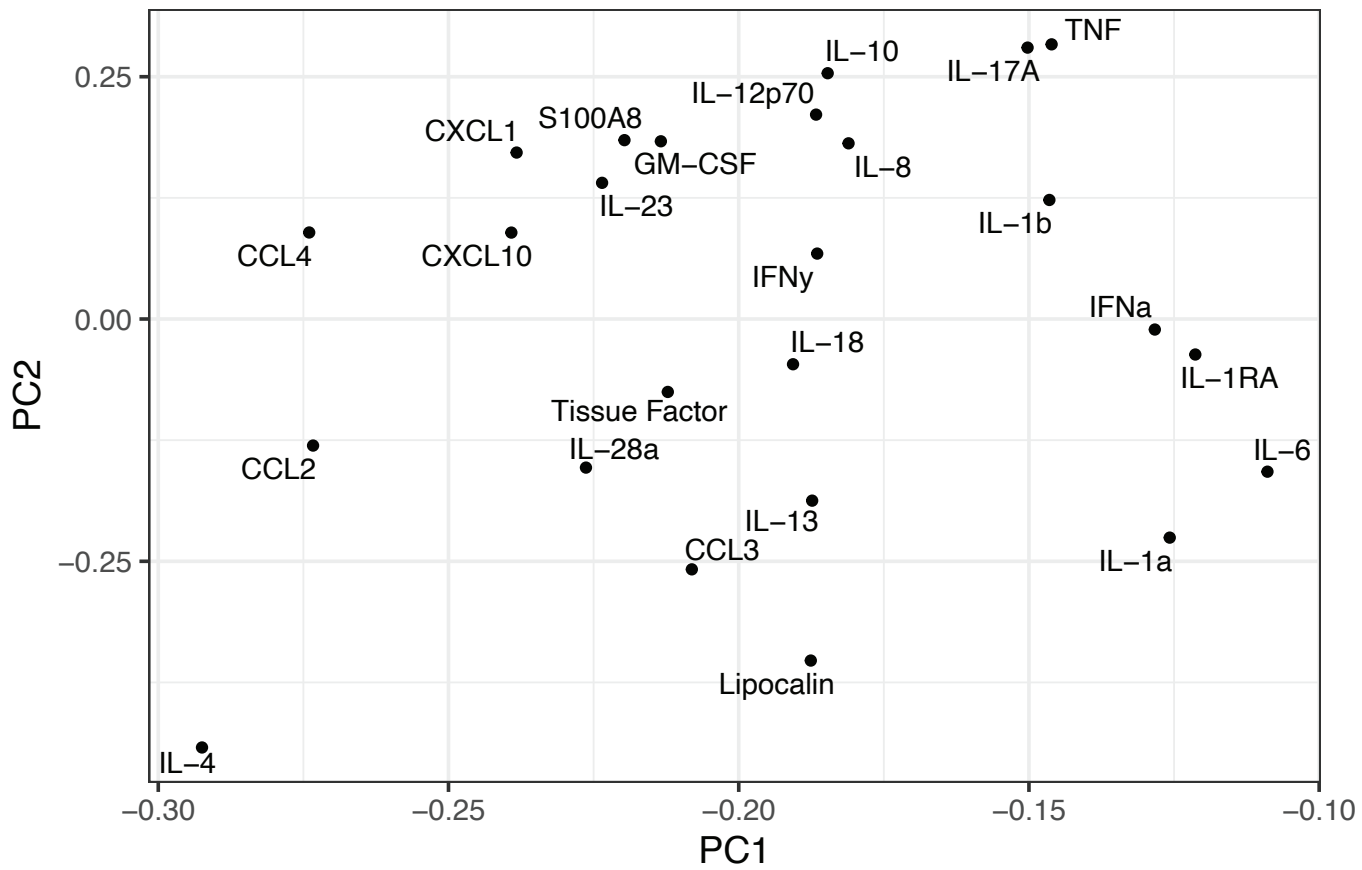

|                     | <b>Df</b> | <b>Sum Of Sqs</b> | <b>R2</b> | <b>F</b> | <b>p value</b> | <b>p value (adjusted)</b> |
|---------------------|-----------|-------------------|-----------|----------|----------------|---------------------------|
| D28 DABA            | 1         | 14.795            | 0.027     | 0.870    | 0.529          | 0.529                     |
| Peak SASS           | 1         | 43.270            | 0.071     | 2.757    | 0.014          | 0.084                     |
| Log10 (Peak URT VL) | 1         | 31.230            | 0.051     | 1.948    | 0.046          | 0.092                     |
| Peak GISS           | 1         | 14.730            | 0.024     | 0.893    | 0.483          | 0.529                     |
| D7 URT VL           | 1         | 61.778            | 0.106     | 4.048    | 0.033          | 0.092                     |
| D7 Faecal VL        | 1         | 32.948            | 0.054     | 2.062    | 0.090          | 0.135                     |



## **Supplementary Figure Legends**

**Supplementary Figure 1: Mild COVID-19 cases have a pronounced proinflammatory gut mucosal cytokine response compared to uninfected controls and patients with severe COVID-19 disease.** Heatmap of Z-scored faecal cytokine concentrations in D7 samples from INSTINCT study participants and D0 (time of enrolment) samples from ISARIC participants grouped according to severity group. Row annotations show concomitant (D7) upper respiratory tract (URT) and faecal viral load measurements vaccination status at the time of enrolment. All vaccinated participants received a single dose of either Pfizer or Oxford/Astra Zeneca COVID-19 vaccination.

**Supplementary Figure 2: Mild COVID-19 cases (n=45) have a pronounced proinflammatory gut mucosal cytokine response.** Concentrations of 17 cytokines in faecal samples stratified by severity groups. Results of Kruskal Wallis tests with Dunn's multiple comparison tests are displayed\*  $p < 0.05$ , \*\* $p < 0.01$ , \*\*\*  $p < 0.001$ , \*\*\*\*  $p < 0.0001$ .

**Supplementary Figure 3: Heatmap of microbiome at the genus level.** Hierarchical clustering of sequenced microbiome (n=83) annotated with severity group, age group, qualitative and quantitative antibiotic data.

**Supplementary Figure 4: Antibiotic usage confounds microbiome data. A.** Alpha diversity of the microbiome sequences by Shannon D index according to severity group. **B.** Contingency table showing how many people were taking antibiotics (0 = no antibiotic use, 1 = used at least one antibiotic) in each severity group.

**Supplementary Figure 5: Serum cytokines do not correlate with D28 DABA or faecal cytokines. A.** Correlation matrix between serum cytokines and D28 DABA measurements. **B.** Correlation matrix between faecal and serum cytokines.

**Supplementary Figure 6:** Loading plot for PCA analysis represented in Figure 2B showing faecal cytokine concentration in PCR-positive cases (n=88) ranging from severity groups 1 to 8.

**Supplementary Figure 7:** Loading plot for PCA analysis represented in Figure 4F showing faecal cytokine concentration in mild PCR+ cases at day 7 (n=45) and day 28 (n=38), and in PCR- cases (n=12).

**Supplementary Table 1:** PERMANOVA of faecal cytokines from PCR+ cases at day 28 (n=38) against day 28 DABA levels, peak SASS, peak GISS, log<sub>10</sub> of peak viral load (VL) in URT, faecal viral load at day 28. And URT viral load at day 28.

#### INSTINCT Contributors

Nieves Derqui  
Aleksandra Koycheva  
Jie Zhou  
Timesh D Pillay  
Michael A Crone  
Seran Hakki  
Rhia Kundu  
Robert Varro  
Emily Conibear  
Kieran J Madon  
Jack L Barnett  
Hamish Houston  
Anika Singanayagam  
Janakan S Narean  
Mica R Tolosa-Wright  
Lucy Mosscrop  
Carolina Rosadas  
Patricia Watber  
Charlotte Anderson  
Eleanor Parker  
Paul S Freemont  
Neil M Ferguson  
Maria Zambon  
Myra O McClure  
Richard Tedder  
Wendy S Barclay  
Jake Dunning  
Graham P Taylor  
Jessica Cutajar  
Valerie Quinn  
Sarah Hammett  
Eimèar McDermott  
Constanta Luca  
Kristel Timcang  
Jada Samuel  
Samuel Bremang  
Samuel Evetts  
Lulu Wang  
Sean Nevin  
Megan Davies  
Chitra Tejpal  
Mohammed Essoussi  
Anjeli V Ketkar  
Giulia Miserocchi  
Harriet Catchpole  
Anjna Badhan  
Simon Dustan  
Isaac J Day Weber  
Federica Marchesin  
Michael G Whitfield  
John Poh  
Alexandra Kondratiuk

#### ISARIC-4C Contributors

| Name              | contribution                                       | email                                                                      |
|-------------------|----------------------------------------------------|----------------------------------------------------------------------------|
| J Kenneth Baillie | *Co-Lead Investigator (Consortium Lead & joint CI) | <a href="mailto:j.k.baillie@ed.ac.uk">j.k.baillie@ed.ac.uk</a>             |
| Peter JM Openshaw | *Co-Lead Investigator (Imperial Colllege)          | <a href="mailto:p.openshaw@imperial.ac.uk">p.openshaw@imperial.ac.uk</a>   |
| Malcolm G Semple  | *Co-Lead Investigator (Protocol CI)                | <a href="mailto:M.G.Semple@liverpool.ac.uk">M.G.Semple@liverpool.ac.uk</a> |
| Beatrice Alex     | Co-Investigator                                    | <a href="mailto:balex@staffmail.ed.ac.uk">balex@staffmail.ed.ac.uk</a>     |

|                      |                 |                                                                                                  |
|----------------------|-----------------|--------------------------------------------------------------------------------------------------|
| Petros Andrikopoulos | Co-Investigator | <a href="mailto:p.andrikopoulos04@imperial.ac.uk">p.andrikopoulos04@imperial.ac.uk</a>           |
| Benjamin Bach        | Co-Investigator | <a href="mailto:beni.bach@gmail.com">beni.bach@gmail.com</a>                                     |
| Wendy S Barclay      | Co-Investigator | <a href="mailto:w.barclay@imperial.ac.uk">w.barclay@imperial.ac.uk</a>                           |
| Debby Bogaert        | Co-Investigator | <a href="mailto:d.bogaert@ed.ac.uk">d.bogaert@ed.ac.uk</a>                                       |
| Meera Chand          | Co-Investigator | <a href="mailto:meera.chand@phe.gov.uk">meera.chand@phe.gov.uk</a>                               |
| Kanta Chechi         | Co-Investigator | <a href="mailto:k.chechi@imperial.ac.uk">k.chechi@imperial.ac.uk</a>                             |
| Graham S Cooke       | Co-Investigator | <a href="mailto:g.cooke@imperial.ac.uk">g.cooke@imperial.ac.uk</a>                               |
| Ana da Silva Filipe  | Co-Investigator | <a href="mailto:Ana.daSilvaFilipe@glasgow.ac.uk">Ana.daSilvaFilipe@glasgow.ac.uk</a>             |
| Thushan de Silva     | Co-Investigator | <a href="mailto:t.desilva@sheffield.ac.uk">t.desilva@sheffield.ac.uk</a>                         |
| Annemarie B Dochert  | Co-Investigator | <a href="mailto:annemarie.docherty@ed.ac.uk">annemarie.docherty@ed.ac.uk</a>                     |
| Gonçalo dos Santos C | Co-Investigator | <a href="mailto:gd2212@ic.ac.uk">gd2212@ic.ac.uk</a>                                             |
| Marc-Emmanuel Durr   | Co-Investigator | <a href="mailto:m.dumas@imperial.ac.uk">m.dumas@imperial.ac.uk</a>                               |
| Jake Dunning         | Co-Investigator | <a href="mailto:j.dunning@imperial.ac.uk">j.dunning@imperial.ac.uk</a>                           |
| Tom Fletcher         | Co-Investigator | <a href="mailto:tom.fletcher@lstm.ac.uk">tom.fletcher@lstm.ac.uk</a>                             |
| Christopher A Green  | Co-Investigator | <a href="mailto:C.A.Green.2@bham.ac.uk">C.A.Green.2@bham.ac.uk</a>                               |
| William Greenhalf    | Co-Investigator | <a href="mailto:greenhaf@liverpool.ac.uk">greenhaf@liverpool.ac.uk</a>                           |
| Julian L Griffin     | Co-Investigator | <a href="mailto:julian.griffin@imperial.ac.uk">julian.griffin@imperial.ac.uk</a>                 |
| Rishi K Gupta        | Co-Investigator | <a href="mailto:r.gupta@ucl.ac.uk">r.gupta@ucl.ac.uk</a>                                         |
| Ewen M Harrison      | Co-Investigator | <a href="mailto:ewen.harrison@ed.ac.uk">ewen.harrison@ed.ac.uk</a>                               |
| Antonia Ying Wai Ho  | Co-Investigator | <a href="mailto:Antonia.Ho@glasgow.ac.uk">Antonia.Ho@glasgow.ac.uk</a>                           |
| Karl Holden          | Co-Investigator | <a href="mailto:karl.holden@liverpool.ac.uk">karl.holden@liverpool.ac.uk</a>                     |
| Peter W Horby        | Co-Investigator | <a href="mailto:peter.horby@ndm.ox.ac.uk">peter.horby@ndm.ox.ac.uk</a>                           |
| Samreen Ijaz         | Co-Investigator | <a href="mailto:Samreen.Ijaz@phe.gov.uk">Samreen.Ijaz@phe.gov.uk</a>                             |
| Saye Khoo            | Co-Investigator | <a href="mailto:S.H.Khoo@liverpool.ac.uk">S.H.Khoo@liverpool.ac.uk</a>                           |
| Paul Klenerman       | Co-Investigator | <a href="mailto:paul.klenerman@medawar.ox.ac.uk">paul.klenerman@medawar.ox.ac.uk</a>             |
| Andrew Law           | Co-Investigator | <a href="mailto:andy.law@roslin.ed.ac.uk">andy.law@roslin.ed.ac.uk</a>                           |
| Matthew R Lewis      | Co-Investigator | <a href="mailto:matthew.lewis@imperial.ac.uk">matthew.lewis@imperial.ac.uk</a>                   |
| Sonia Liggi          | Co-Investigator | <a href="mailto:s.liggi@imperial.ac.uk">s.liggi@imperial.ac.uk</a>                               |
| Wei Shen Lim         | Co-Investigator | <a href="mailto:WeiShen.Lim@nuh.nhs.uk">WeiShen.Lim@nuh.nhs.uk</a>                               |
| Lynn Maslen          | Co-Investigator | <a href="mailto:l.maslen@imperial.ac.uk">l.maslen@imperial.ac.uk</a>                             |
| Alexander J Mentzer  | Co-Investigator | <a href="mailto:alexander.mentzer@ndm.ox.ac.uk">alexander.mentzer@ndm.ox.ac.uk</a>               |
| Laura Merson         | Co-Investigator | <a href="mailto:laura.merson@ndm.ox.ac.uk">laura.merson@ndm.ox.ac.uk</a>                         |
| Alison M Meynert     | Co-Investigator | <a href="mailto:alison.meynert@igmm.ed.ac.uk">alison.meynert@igmm.ed.ac.uk</a>                   |
| Shona C Moore        | Co-Investigator | <a href="mailto:Shona.Moore@liverpool.ac.uk">Shona.Moore@liverpool.ac.uk</a>                     |
| Mahdad Noursadeghi   | Co-Investigator | <a href="mailto:m.noursadeghi@ucl.ac.uk">m.noursadeghi@ucl.ac.uk</a>                             |
| Michael Olanipekun   | Co-Investigator | <a href="mailto:m.olanipekun16@imperial.ac.uk">m.olanipekun16@imperial.ac.uk</a>                 |
| Anthonia Osagie      | Co-Investigator | <a href="mailto:anthonia.osagie17@imperial.ac.uk">anthonia.osagie17@imperial.ac.uk</a>           |
| Massimo Palmarini    | Co-Investigator | <a href="mailto:Massimo.Palmarini@glasgow.ac.uk">Massimo.Palmarini@glasgow.ac.uk</a>             |
| Carlo Palmieri       | Co-Investigator | <a href="mailto:cpalmi@liverpool.ac.uk">cpalmi@liverpool.ac.uk</a>                               |
| William A Paxton     | Co-Investigator | <a href="mailto:w.a.paxton@liverpool.ac.uk">w.a.paxton@liverpool.ac.uk</a>                       |
| Georgios Pollakis    | Co-Investigator | <a href="mailto:g.pollakis@liverpool.ac.uk">g.pollakis@liverpool.ac.uk</a>                       |
| Nicholas Price       | Co-Investigator | <a href="mailto:nicholas.price@guvsandstthomas.nhs.uk">nicholas.price@guvsandstthomas.nhs.uk</a> |
| Andrew Rambaut       | Co-Investigator | <a href="mailto:a.rambaut@ed.ac.uk">a.rambaut@ed.ac.uk</a>                                       |
| David L Robertson    | Co-Investigator | <a href="mailto:david.l.robertson@glasgow.ac.uk">david.l.robertson@glasgow.ac.uk</a>             |
| Clark D Russell      | Co-Investigator | <a href="mailto:clarkdrussell@gmail.com">clarkdrussell@gmail.com</a>                             |
| Vanessa Sancho-Shir  | Co-Investigator | <a href="mailto:v.sancho-shimizu@imperial.ac.uk">v.sancho-shimizu@imperial.ac.uk</a>             |
| Caroline J Sands     | Co-Investigator | <a href="mailto:Caroline.Sands01@imperial.ac.uk">Caroline.Sands01@imperial.ac.uk</a>             |
| Janet T Scott        | Co-Investigator | <a href="mailto:Janet.Scott@glasgow.ac.uk">Janet.Scott@glasgow.ac.uk</a>                         |
| Louise Sigfrid       | Co-Investigator | <a href="mailto:louise.sigfrid@gmail.com">louise.sigfrid@gmail.com</a>                           |
| Tom Solomon          | Co-Investigator | <a href="mailto:tsolomon@liverpool.ac.uk">tsolomon@liverpool.ac.uk</a>                           |
| Shiranee Sriskandan  | Co-Investigator | <a href="mailto:s.sriskandan@imperial.ac.uk">s.sriskandan@imperial.ac.uk</a>                     |
| David Stuart         | Co-Investigator | <a href="mailto:stuart-pa@strubi.ox.ac.uk">stuart-pa@strubi.ox.ac.uk</a>                         |
| Charlotte Summers    | Co-Investigator | <a href="mailto:cs493@medschl.cam.ac.uk">cs493@medschl.cam.ac.uk</a>                             |
| Olivia V Swann       | Co-Investigator | <a href="mailto:Olivia.Swann@ed.ac.uk">Olivia.Swann@ed.ac.uk</a>                                 |
| Zoltan Takats        | Co-Investigator | <a href="mailto:z.takats@imperial.ac.uk">z.takats@imperial.ac.uk</a>                             |
| Panteleimon Takis    | Co-Investigator | <a href="mailto:p.takis@imperial.ac.uk">p.takis@imperial.ac.uk</a>                               |
| Richard S Tedder     | Co-Investigator | <a href="mailto:richardtedder123@gmail.com">richardtedder123@gmail.com</a>                       |
| AA Roger Thompson    | Co-Investigator | <a href="mailto:R.Thompson@sheffield.ac.uk">R.Thompson@sheffield.ac.uk</a>                       |
| Emma C Thomson       | Co-Investigator | <a href="mailto:emma.thomson@glasgow.ac.uk">emma.thomson@glasgow.ac.uk</a>                       |
| Ryan S Thwaites      | Co-Investigator | <a href="mailto:r.thwaites@imperial.ac.uk">r.thwaites@imperial.ac.uk</a>                         |
| Lance CW Turtle      | Co-Investigator | <a href="mailto:lance.turtle@liverpool.ac.uk">lance.turtle@liverpool.ac.uk</a>                   |

|                      |                                           |                                                                                                                                             |
|----------------------|-------------------------------------------|---------------------------------------------------------------------------------------------------------------------------------------------|
| Maria Zambon         | Co-Investigator                           | <a href="mailto:Maria.Zambon@phe.gov.uk">Maria.Zambon@phe.gov.uk</a>                                                                        |
| Thomas M Drake       | Data Analyst                              | <a href="mailto:t.drake@ed.ac.uk">t.drake@ed.ac.uk</a>                                                                                      |
| Cameron J Fairfield  | Data Analyst                              | <a href="mailto:cameron.fairfield@ed.ac.uk">cameron.fairfield@ed.ac.uk</a>                                                                  |
| Stephen R Knight     | Data Analyst                              | <a href="mailto:stephen.knight@ed.ac.uk">stephen.knight@ed.ac.uk</a>                                                                        |
| Kenneth A Mclean     | Data Analyst                              | <a href="mailto:k.a.mclean@ed.ac.uk">k.a.mclean@ed.ac.uk</a>                                                                                |
| Derek Murphy         | Data Analyst                              | <a href="mailto:derek.murphy@ed.ac.uk">derek.murphy@ed.ac.uk</a>                                                                            |
| Lisa Norman          | Data Analyst                              | <a href="mailto:lisa.norman@ed.ac.uk">lisa.norman@ed.ac.uk</a>                                                                              |
| Riinu Pius           | Data Analyst                              | <a href="mailto:riinu.pius@ed.ac.uk">riinu.pius@ed.ac.uk</a>                                                                                |
| Catherine A Shaw     | Data Analyst                              | <a href="mailto:catherine.shaw@ed.ac.uk">catherine.shaw@ed.ac.uk</a>                                                                        |
| Marie Connor         | Data and Information System Manager       |                                                                                                                                             |
| Jo Dalton            | Data and Information System Manager       |                                                                                                                                             |
| Carrol Gamble        | Data and Information System Manager       | <a href="mailto:carrolp@liverpool.ac.uk">carrolp@liverpool.ac.uk</a>                                                                        |
| Michelle Girvan      | Data and Information System Manager       | <a href="mailto:mhodki@liverpool.ac.uk">mhodki@liverpool.ac.uk</a>                                                                          |
| Sophie Halpin        | Data and Information System Manager       | <a href="mailto:sophieh@liverpool.ac.uk">sophieh@liverpool.ac.uk</a>                                                                        |
| Janet Harrison       | Data and Information System Manager       |                                                                                                                                             |
| Clare Jackson        | Data and Information System Manager       |                                                                                                                                             |
| James Lee            | Data and Information System Manager       |                                                                                                                                             |
| Laura Marsh          | Data and Information System Manager       |                                                                                                                                             |
| Daniel Plotkin       | Data and Information System Manager       |                                                                                                                                             |
| Stephanie Roberts    | Data and Information System Manager       |                                                                                                                                             |
| Egle Saviciute       | Data and Information System Manager       |                                                                                                                                             |
| Sara Clohisey        | Data Integration and Presentation         | <a href="mailto:sara.clohisey@roslin.ed.ac.uk">sara.clohisey@roslin.ed.ac.uk</a>                                                            |
| Ross Hendry          | Data Integration and Presentation         | <a href="mailto:rhendry@gmail.com">rhendry@gmail.com</a>                                                                                    |
| Susan Knight         | Data Integration and Presentation         | <a href="mailto:susan.knight2@phs.scot">susan.knight2@phs.scot</a>                                                                          |
| Eva Lahnsteiner      | Data Integration and Presentation         | <a href="mailto:eva.lahnsteiner@phs.scot">eva.lahnsteiner@phs.scot</a>                                                                      |
| Andrew Law           | Data Integration and Presentation         | <a href="mailto:andy.law@roslin.ed.ac.uk">andy.law@roslin.ed.ac.uk</a>                                                                      |
| Gary Leeming         | Data Integration and Presentation         | <a href="mailto:gary.leeming@liverpool.ac.uk">gary.leeming@liverpool.ac.uk</a>                                                              |
| Lucy Norris          | Data Integration and Presentation         | <a href="mailto:l.norris@epcc.ed.ac.uk">l.norris@epcc.ed.ac.uk</a>                                                                          |
| James Scott-Brown    | Data Integration and Presentation         | <a href="mailto:james.scott-brown@ed.ac.uk">james.scott-brown@ed.ac.uk</a>                                                                  |
| Sarah Tait           | Data Integration and Presentation         | <a href="mailto:sarah.tait4@phs.scot">sarah.tait4@phs.scot</a>                                                                              |
| Murray Wham          | Data Integration and Presentation         | <a href="mailto:murray.wham@ed.ac.uk">murray.wham@ed.ac.uk</a>                                                                              |
| Richard Clark        | Edinburgh Laboratory Staff and Volunteers | <a href="mailto:richard.clark@ed.ac.uk">richard.clark@ed.ac.uk</a>                                                                          |
| Audrey Coutts        | Edinburgh Laboratory Staff and Volunteers | <a href="mailto:aduncan5@exseed.ed.ac.uk">aduncan5@exseed.ed.ac.uk</a>                                                                      |
| Lorna Donnelly       | Edinburgh Laboratory Staff and Volunteers | <a href="mailto:lorna.donnelly@ed.ac.uk">lorna.donnelly@ed.ac.uk</a>                                                                        |
| Angie Fawkes         | Edinburgh Laboratory Staff and Volunteers | <a href="mailto:afawkes@ed.ac.uk">afawkes@ed.ac.uk</a>                                                                                      |
| Tammy Gilchrist      | Edinburgh Laboratory Staff and Volunteers | <a href="mailto:Tammy.Gilchrist@ed.ac.uk">Tammy.Gilchrist@ed.ac.uk</a>                                                                      |
| Katarzyna Hafezi     | Edinburgh Laboratory Staff and Volunteers | <a href="mailto:khafezi@ed.ac.uk">khafezi@ed.ac.uk</a>                                                                                      |
| Louise MacGillivray  | Edinburgh Laboratory Staff and Volunteers | <a href="mailto:louise.evenden@ed.ac.uk">louise.evenden@ed.ac.uk</a>                                                                        |
| Alan Maclean         | Edinburgh Laboratory Staff and Volunteers | <a href="mailto:A.W.Maclean@ed.ac.uk">A.W.Maclean@ed.ac.uk</a>                                                                              |
| Sarah McCafferty     | Edinburgh Laboratory Staff and Volunteers | <a href="mailto:Sarah.McCafferty@ed.ac.uk">Sarah.McCafferty@ed.ac.uk</a>                                                                    |
| Kirstie Morrice      | Edinburgh Laboratory Staff and Volunteers | <a href="mailto:kirstie.morrice@ed.ac.uk">kirstie.morrice@ed.ac.uk</a>                                                                      |
| Lee Murphy           | Edinburgh Laboratory Staff and Volunteers | <a href="mailto:Lee.Murphy@ed.ac.uk">Lee.Murphy@ed.ac.uk</a>                                                                                |
| Nicola Wrobel        | Edinburgh Laboratory Staff and Volunteers | <a href="mailto:Nicola.Wrobel@ed.ac.uk">Nicola.Wrobel@ed.ac.uk</a>                                                                          |
| Gail Carson          | ISARIC Clinical Coordinator               | <a href="mailto:gail.carson@ndm.ox.ac.uk">gail.carson@ndm.ox.ac.uk</a>                                                                      |
| Kayode Adeniji       | Local Principal Investigators             | <a href="mailto:Kayode.Adeniji@porthosp.nhs.uk">Kayode.Adeniji@porthosp.nhs.uk</a>                                                          |
| Daniel Agranoff      | Local Principal Investigators             | <a href="mailto:daniel.agranoff@nhs.net">daniel.agranoff@nhs.net</a>                                                                        |
| Ken Agwuh            | Local Principal Investigators             | <a href="mailto:kenneth.agwuh@nhs.net">kenneth.agwuh@nhs.net</a>                                                                            |
| Dhiraj Ail           | Local Principal Investigators             | <a href="mailto:dhiraj.ail@nhs.net">dhiraj.ail@nhs.net</a>                                                                                  |
| Erin L. Aldera       | Local Principal Investigators             |                                                                                                                                             |
| Ana Alegria          | Local Principal Investigators             | <a href="mailto:ana.alegria@nhs.net">ana.alegria@nhs.net</a>                                                                                |
| Sam Allen            | Local Principal Investigators             |                                                                                                                                             |
| Brian Angus          | Local Principal Investigators             | <a href="mailto:Brian.Angus@ouh.nhs.uk">Brian.Angus@ouh.nhs.uk</a> ; <a href="mailto:Brian.Angus@ndm.ox.ac.uk">Brian.Angus@ndm.ox.ac.uk</a> |
| Abdul Ashish         | Local Principal Investigators             | <a href="mailto:Abdul.Ashish@wwl.nhs.uk">Abdul.Ashish@wwl.nhs.uk</a>                                                                        |
| Dougal Atkinson      | Local Principal Investigators             | <a href="mailto:Dougal.Atkinson@mft.nhs.uk">Dougal.Atkinson@mft.nhs.uk</a>                                                                  |
| Shahedal Bari        | Local Principal Investigators             | <a href="mailto:shahedal.bari@mbht.nhs.uk">shahedal.bari@mbht.nhs.uk</a>                                                                    |
| Gavin Barlow         | Local Principal Investigators             | <a href="mailto:Gavin.Barlow@hey.nhs.uk">Gavin.Barlow@hey.nhs.uk</a>                                                                        |
| Stella Barnass       | Local Principal Investigators             |                                                                                                                                             |
| Nicholas Barrett     | Local Principal Investigators             |                                                                                                                                             |
| Christopher Bassford | Local Principal Investigators             |                                                                                                                                             |
| Sneha Basude         | Local Principal Investigators             |                                                                                                                                             |
| David Baxter         | Local Principal Investigators             |                                                                                                                                             |

Michael Beadsworth Local Principal Investigators  
Jolanta Bernatoniene Local Principal Investigators  
John Berridge Local Principal Investigators  
Colin Berry Local Principal Investigators  
Nicola Best Local Principal Investigators  
Pieter Bothma Local Principal Investigators  
Robin Brittain-Long Local Principal Investigators  
Naomi Bulteel Local Principal Investigators  
Tom Burden Local Principal Investigators  
Andrew Burtenshaw Local Principal Investigators  
Vikki Caruth Local Principal Investigators  
David Chadwick Local Principal Investigators  
David Chadwick Local Principal Investigators  
Duncan Chambler Local Principal Investigators  
Nigel Chee Local Principal Investigators  
Jenny Child Local Principal Investigators  
Srikanth Chukkambotl Local Principal Investigators  
Tom Clark Local Principal Investigators  
Paul Collini Local Principal Investigators  
Catherine Cosgrove Local Principal Investigators  
Jason Cupitt Local Principal Investigators  
Maria-Teresa Cutino- Local Principal Investigators  
Paul Dark Local Principal Investigators  
Chris Dawson Local Principal Investigators  
Samir Dervisevic Local Principal Investigators  
Phil Donnison Local Principal Investigators  
Sam Douthwaite Local Principal Investigators  
Andrew Drummond Local Principal Investigators  
Ingrid DuRand Local Principal Investigators  
Ahilanadan Dushiantf Local Principal Investigators  
Tristan Dyer Local Principal Investigators  
Cariad Evans Local Principal Investigators  
Chi Eziefula Local Principal Investigators  
Chrisopher Fegan Local Principal Investigators  
Adam Finn Local Principal Investigators  
Duncan Fullerton Local Principal Investigators  
Sanjeev Garg Local Principal Investigators  
Atul Garg Local Principal Investigators  
Effrossyni Gkrania-Kl Local Principal Investigators  
Jo Godden Local Principal Investigators  
Arthur Goldsmith Local Principal Investigators  
Clive Graham Local Principal Investigators  
Tassos Grammatikop Local Principal Investigators  
Elaine Hardy Local Principal Investigators  
Stuart Hartshorn Local Principal Investigators  
Daniel Harvey Local Principal Investigators  
Peter Havalda Local Principal Investigators  
Daniel B Hawcutt Local Principal Investigators  
Maria Hobrok Local Principal Investigators  
Luke Hodgson Local Principal Investigators  
Anil Hormis Local Principal Investigators  
Joanne Howard Local Principal Investigators  
Michael Jacobs Local Principal Investigators  
Susan Jain Local Principal Investigators  
Paul Jennings Local Principal Investigators  
Agilan Kaliappan Local Principal Investigators  
Vidya Kasipandian Local Principal Investigators  
Stephen Kegg Local Principal Investigators  
Michael Kelsey Local Principal Investigators  
Jason Kendall Local Principal Investigators  
Caroline Kerrison Local Principal Investigators

[Colin.Berry@glasgow.ac.uk](mailto:Colin.Berry@glasgow.ac.uk)

[andrew.drummond@pat.nhs.uk](mailto:andrew.drummond@pat.nhs.uk)

[t.grammatikopoulos@nhs.net](mailto:t.grammatikopoulos@nhs.net)

Ian Kerslake Local Principal Investigators  
Oliver Koch Local Principal Investigators  
Gouri Koduri Local Principal Investigators  
George Koshy Local Principal Investigators  
Shondipon Laha Local Principal Investigators  
Steven Laird Local Principal Investigators  
Susan Larkin Local Principal Investigators  
Tamas Leiner Local Principal Investigators  
Patrick Lillie Local Principal Investigators  
James Limb Local Principal Investigators  
Vanessa Linnett Local Principal Investigators  
Jeff Little Local Principal Investigators  
Mark Lyttle Local Principal Investigators  
Michael MacMahon Local Principal Investigators  
Emily MacNaughton Local Principal Investigators  
Ravish Mankregod Local Principal Investigators  
Huw Masson Local Principal Investigators  
Elijah Matovu Local Principal Investigators  
Katherine McCullough Local Principal Investigators  
Ruth McEwen Local Principal Investigators  
Manjula Meda Local Principal Investigators  
Gary Mills Local Principal Investigators  
Jane Minton Local Principal Investigators  
Kavya Mohandas Local Principal Investigators  
Quen Mok Local Principal Investigators  
James Moon Local Principal Investigators  
Elinoor Moore Local Principal Investigators  
Patrick Morgan Local Principal Investigators  
Craig Morris Local Principal Investigators  
Katherine Mortimore Local Principal Investigators  
Samuel Moses Local Principal Investigators  
Mbiye Mpenge Local Principal Investigators  
Rohinton Mulla Local Principal Investigators  
Michael Murphy Local Principal Investigators  
Thapas Nagarajan Local Principal Investigators  
Megan Nagel Local Principal Investigators  
Mark Nelson Local Principal Investigators  
Lillian Norris Local Principal Investigators  
Matthew K. O'Shea Local Principal Investigators  
Marlies Ostermann Local Principal Investigators  
Igor Otahal Local Principal Investigators  
Mark Pais Local Principal Investigators  
Carlo Palmieri Local Principal Investigators  
Selva Panchatsharam Local Principal Investigators  
Danai Papakonstantino Local Principal Investigators  
Padmasayee Papinen Local Principal Investigators  
Hassan Paraiso Local Principal Investigators  
Brij Patel Local Principal Investigators  
Natalie Pattison Local Principal Investigators  
Justin Pepperell Local Principal Investigators  
Mark Peters Local Principal Investigators  
Mandeep Phull Local Principal Investigators  
Stefania Pintus Local Principal Investigators  
Tim Planche Local Principal Investigators  
Frank Post Local Principal Investigators  
David Price Local Principal Investigators  
Rachel Prout Local Principal Investigators  
Nikolas Rae Local Principal Investigators  
Henrik Reschreiter Local Principal Investigators  
Tim Reynolds Local Principal Investigators  
Neil Richardson Local Principal Investigators

Inorris1@nhs.net

[c.palmieri@liverpool.ac.uk](mailto:c.palmieri@liverpool.ac.uk)

|                     |                                          |
|---------------------|------------------------------------------|
| Mark Roberts        | Local Principal Investigators            |
| Devender Roberts    | Local Principal Investigators            |
| Alistair Rose       | Local Principal Investigators            |
| Guy Rousseau        | Local Principal Investigators            |
| Bobby Ruge          | Local Principal Investigators            |
| Brendan Ryan        | Local Principal Investigators            |
| Taranprit Saluja    | Local Principal Investigators            |
| Sarah Cole          | Local Principal Investigators            |
| Matthias L Schmid   | Local Principal Investigators            |
| Aarti Shah          | Local Principal Investigators            |
| Manu Shankar-Hari   | Local Principal Investigators            |
| Prad Shanmuga       | Local Principal Investigators            |
| Anil Sharma         | Local Principal Investigators            |
| Anna Shawcross      | Local Principal Investigators            |
| Jagtur Singh Pooni  | Local Principal Investigators            |
| Jeremy Sizer        | Local Principal Investigators            |
| Richard Smith       | Local Principal Investigators            |
| Catherine Snelson   | Local Principal Investigators            |
| Nick Spittle        | Local Principal Investigators            |
| Nikki Staines       | Local Principal Investigators            |
| Tom Stambach        | Local Principal Investigators            |
| Richard Stewart     | Local Principal Investigators            |
| Pradeep Subudhi     | Local Principal Investigators            |
| Tamas Szakmany      | Local Principal Investigators            |
| Kate Tatham         | Local Principal Investigators            |
| Jo Thomas           | Local Principal Investigators            |
| Chris Thompson      | Local Principal Investigators            |
| Robert Thompson     | Local Principal Investigators            |
| Ascanio Tridente    | Local Principal Investigators            |
| Darell Tupper-Carey | Local Principal Investigators            |
| Mary Twagira        | Local Principal Investigators            |
| Nick Vallotton      | Local Principal Investigators            |
| Rama Vancheeswara   | Local Principal Investigators            |
| Rachel Vincent      | Local Principal Investigators            |
| Lisa Vincent-Smith  | Local Principal Investigators            |
| Shico Visuvanathan  | Local Principal Investigators            |
| Alan Vuylsteke      | Local Principal Investigators            |
| Sam Waddy           | Local Principal Investigators            |
| Rachel Wake         | Local Principal Investigators            |
| Andrew Walden       | Local Principal Investigators            |
| Ingeborg Welters    | Local Principal Investigators            |
| Tony Whitehouse     | Local Principal Investigators            |
| Paul Whittaker      | Local Principal Investigators            |
| Ashley Whittington  | Local Principal Investigators            |
| Meme Wijesinghe     | Local Principal Investigators            |
| Martin Williams     | Local Principal Investigators            |
| Lawrence Wilson     | Local Principal Investigators            |
| Stephen Winchester  | Local Principal Investigators            |
| Martin Wiselka      | Local Principal Investigators            |
| Adam Wolverson      | Local Principal Investigators            |
| Daniel G Wootton    | Local Principal Investigators            |
| Andrew Workman      | Local Principal Investigators            |
| Bryan Yates         | Local Principal Investigators            |
| Peter Young         | Local Principal Investigators            |
| Sarah E McDonald    | Material Management                      |
| Victoria Shaw       | Material Management                      |
| Katie A. Ahmed      | Outbreak Laboratory Staff and Volunteers |
| Jane A Armstrong    | Outbreak Laboratory Staff and Volunteers |
| Milton Ashworth     | Outbreak Laboratory Staff and Volunteers |
| Innocent G Asiimwe  | Outbreak Laboratory Staff and Volunteers |
| Siddharth Bakshi    | Outbreak Laboratory Staff and Volunteers |

[rama.vancheeswaran@nhs.net](mailto:rama.vancheeswaran@nhs.net)

[sarah.mcdonald@glasgow.ac.uk](mailto:sarah.mcdonald@glasgow.ac.uk)

[Victoria.Shaw@liverpool.ac.uk](mailto:Victoria.Shaw@liverpool.ac.uk)

|                        |                                          |
|------------------------|------------------------------------------|
| Samantha L Barlow      | Outbreak Laboratory Staff and Volunteers |
| Laura Booth            | Outbreak Laboratory Staff and Volunteers |
| Benjamin Brennan       | Outbreak Laboratory Staff and Volunteers |
| Katie Bullock          | Outbreak Laboratory Staff and Volunteers |
| Nicola Carlucci        | Outbreak Laboratory Staff and Volunteers |
| Emily Cass             | Outbreak Laboratory Staff and Volunteers |
| Benjamin WA Cattera    | Outbreak Laboratory Staff and Volunteers |
| Jordan J Clark         | Outbreak Laboratory Staff and Volunteers |
| Emily A Clarke         | Outbreak Laboratory Staff and Volunteers |
| Sarah Cole             | Outbreak Laboratory Staff and Volunteers |
| Louise Cooper          | Outbreak Laboratory Staff and Volunteers |
| Helen Cox              | Outbreak Laboratory Staff and Volunteers |
| Christopher Davis      | Outbreak Laboratory Staff and Volunteers |
| Oslem Dincarslan       | Outbreak Laboratory Staff and Volunteers |
| Alejandra Doce Carrace | Outbreak Laboratory Staff and Volunteers |
| Chris Dunn             | Outbreak Laboratory Staff and Volunteers |
| Philip Dyer            | Outbreak Laboratory Staff and Volunteers |
| Angela Elliott         | Outbreak Laboratory Staff and Volunteers |
| Anthony Evans          | Outbreak Laboratory Staff and Volunteers |
| Lorna Finch            | Outbreak Laboratory Staff and Volunteers |
| Lewis WS Fisher        | Outbreak Laboratory Staff and Volunteers |
| Lisa Flaherty          | Outbreak Laboratory Staff and Volunteers |
| Terry Foster           | Outbreak Laboratory Staff and Volunteers |
| Isabel Garcia-Dorival  | Outbreak Laboratory Staff and Volunteers |
| Philip Gunning         | Outbreak Laboratory Staff and Volunteers |
| Catherine Hartley      | Outbreak Laboratory Staff and Volunteers |
| Anthony Holmes         | Outbreak Laboratory Staff and Volunteers |
| Rebecca L Jensen       | Outbreak Laboratory Staff and Volunteers |
| Christopher B Jones    | Outbreak Laboratory Staff and Volunteers |
| Trevor R Jones         | Outbreak Laboratory Staff and Volunteers |
| Shadia Khandaker       | Outbreak Laboratory Staff and Volunteers |
| Katharine King         | Outbreak Laboratory Staff and Volunteers |
| Robyn T. Kiy           | Outbreak Laboratory Staff and Volunteers |
| Chrysa Koukorava       | Outbreak Laboratory Staff and Volunteers |
| Annette Lake           | Outbreak Laboratory Staff and Volunteers |
| Suzannah Lant          | Outbreak Laboratory Staff and Volunteers |
| Diane Latawiec         | Outbreak Laboratory Staff and Volunteers |
| Lara Lavelle-Langham   | Outbreak Laboratory Staff and Volunteers |
| Daniella Lefteri       | Outbreak Laboratory Staff and Volunteers |
| Lauren Lett            | Outbreak Laboratory Staff and Volunteers |
| Lucia A Livoti         | Outbreak Laboratory Staff and Volunteers |
| Maria Mancini          | Outbreak Laboratory Staff and Volunteers |
| Hannah Massey          | Outbreak Laboratory Staff and Volunteers |
| Nicole Maziere         | Outbreak Laboratory Staff and Volunteers |
| Sarah McDonald         | Outbreak Laboratory Staff and Volunteers |
| Laurence McEvoy        | Outbreak Laboratory Staff and Volunteers |
| John McLauchlan        | Outbreak Laboratory Staff and Volunteers |
| Soeren Metelmann       | Outbreak Laboratory Staff and Volunteers |
| Nahida S Miah          | Outbreak Laboratory Staff and Volunteers |
| Joanna Middleton       | Outbreak Laboratory Staff and Volunteers |
| Joyce Mitchell         | Outbreak Laboratory Staff and Volunteers |
| Shona C Moore          | Outbreak Laboratory Staff and Volunteers |
| Ellen G Murphy         | Outbreak Laboratory Staff and Volunteers |
| Rebekah Penrice-Ran    | Outbreak Laboratory Staff and Volunteers |
| Jack Pilgrim           | Outbreak Laboratory Staff and Volunteers |
| Tessa Prince           | Outbreak Laboratory Staff and Volunteers |
| Will Reynolds          | Outbreak Laboratory Staff and Volunteers |
| P. Matthew Ridley      | Outbreak Laboratory Staff and Volunteers |
| Debby Sales            | Outbreak Laboratory Staff and Volunteers |
| Victoria E Shaw        | Outbreak Laboratory Staff and Volunteers |
| Rebecca K Shears       | Outbreak Laboratory Staff and Volunteers |



|                       |                                          |
|-----------------------|------------------------------------------|
| Benjamin Small        | Outbreak Laboratory Staff and Volunteers |
| Krishanthi S Subrama  | Outbreak Laboratory Staff and Volunteers |
| Agnieska Szemiel      | Outbreak Laboratory Staff and Volunteers |
| Aislynn Taggart       | Outbreak Laboratory Staff and Volunteers |
| Jolanta Taniaris-Hugl | Outbreak Laboratory Staff and Volunteers |
| Jordan Thomas         | Outbreak Laboratory Staff and Volunteers |
| Erwan Trochu          | Outbreak Laboratory Staff and Volunteers |
| Libby van Tonder      | Outbreak Laboratory Staff and Volunteers |
| Eve Wilcock           | Outbreak Laboratory Staff and Volunteers |
| J. Eunice Zhang       | Outbreak Laboratory Staff and Volunteers |
| Seán Keating          | Patient Engagement                       |
| Cara Donegan          | Project Administrator                    |
| Rebecca G. Spencer    | Project Administrator                    |
| Chloe Donohue         | Project Manager                          |
| Fiona Griffiths       | Project Manager                          |
| Hayley Hardwick       | Project Manager                          |
| Wilna Oosthuizen      | Project Manager                          |

[sean.keating@nhslothian.scot.nhs.uk](mailto:sean.keating@nhslothian.scot.nhs.uk)

[c.donegan@liverpool.ac.uk](mailto:c.donegan@liverpool.ac.uk)

[rebecca.spencer@liverpool.ac.uk](mailto:rebecca.spencer@liverpool.ac.uk)

[C.Donohue@liverpool.ac.uk](mailto:C.Donohue@liverpool.ac.uk)

[fiona.griffiths@ed.ac.uk](mailto:fiona.griffiths@ed.ac.uk)

[h.e.hardwick@liverpool.ac.uk](mailto:h.e.hardwick@liverpool.ac.uk)

[wilna.oosthuizen@ed.ac.uk](mailto:wilna.oosthuizen@ed.ac.uk)

**Highlights:**

- SARS-CoV-2 viral load trajectories in the upper respiratory tract and gut are non-correlated
- A transient gut cytokine signature is associated with increased systemic antibody responses to SARS-CoV-2
- In hospitalised patients, production of gut cytokines comprising the aforementioned signature associates with favourable clinical outcomes
